# Supplementary material for: Chemiosomotic flow in a soft conical nanopore: harvesting enhanced blue energy
Source: Royal Society of Chemistry journal article supplement (doi:10.1039/d2sm01096h), 2022-12-28
Supplement: d2sm01096h1.pdf [file d2sm01096h1.pdf]

# Supplementary Material

## Chemoosmotic Flow in a Soft Conical Nanopore: Harvesting Enhanced Blue Energy

Doyel Pandey, Pranab Kumar Mondal \*, Somchai Wongwises

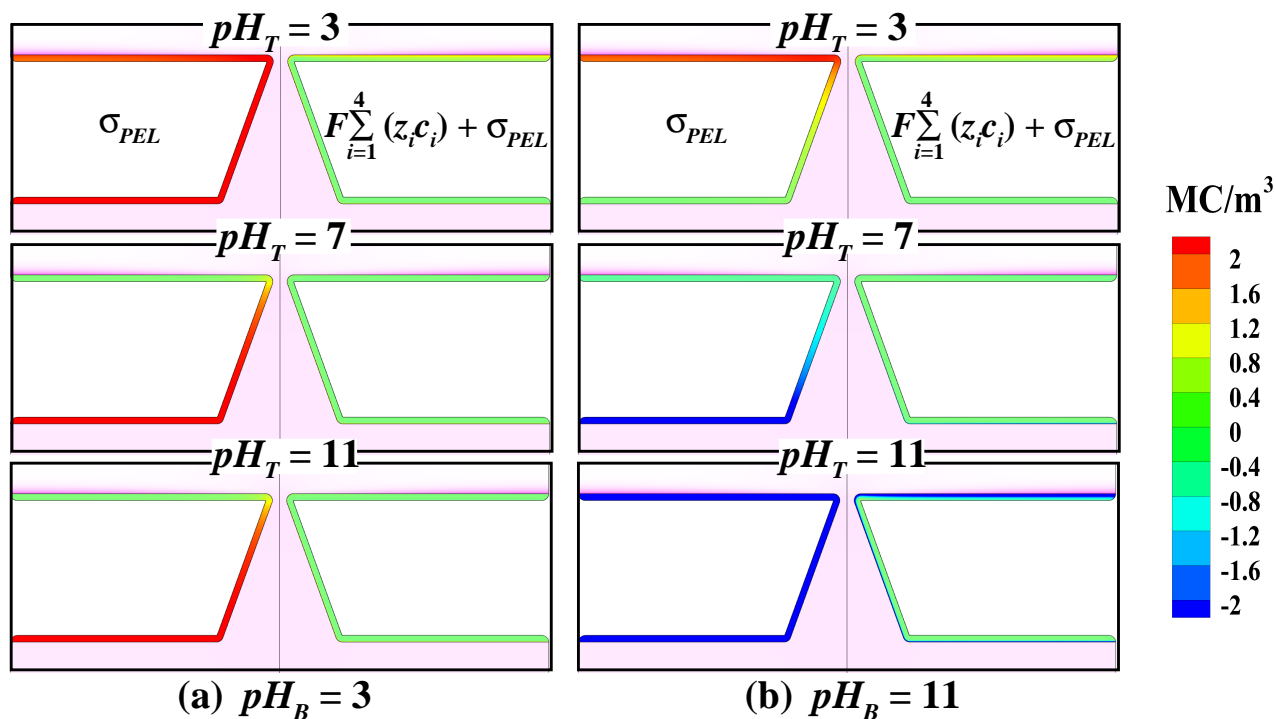

Figure S1: pH-dependent space charge density  $\sigma_{PEL}$  (left side) and total space charge density  $F \sum_{i=1}^4 z_i c_i + \sigma_{PEL}$  (right side) are shown for two extreme values of (a)  $pH_B = 3$  and (b)  $pH_B = 11$  with  $pH_T = 3, 7, 11$ ;  $c_B = 10^3$  mM,  $c_T = 10$  mM.

\*Corresponding author. E-mail: pranabm@iitg.ac.in

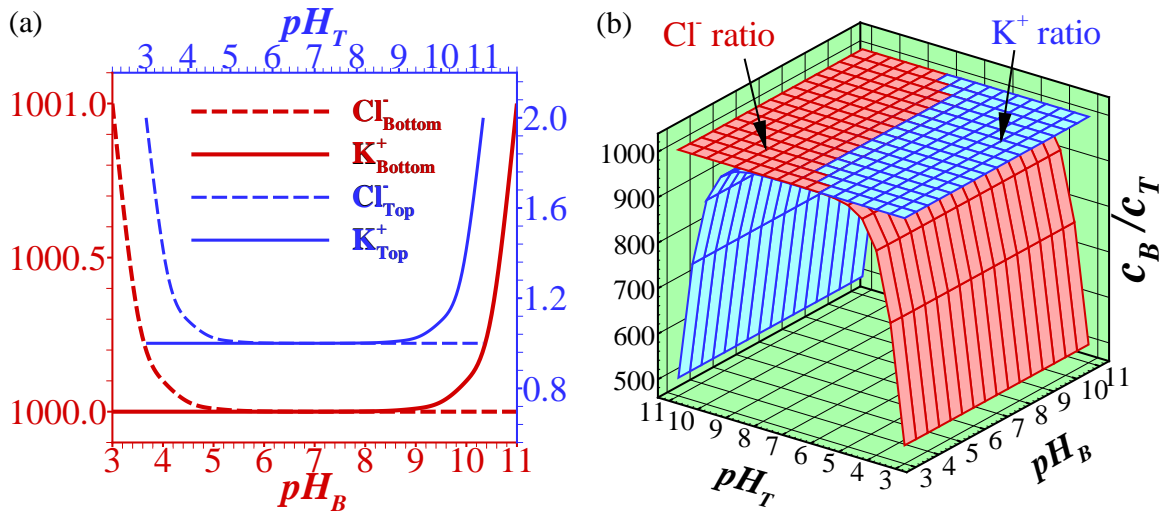

Figure S2: At  $c_B = 10^3$  mM and  $c_T = 10^0$  mM, the (a) bulk concentrations and (b) concentration ratios of  $\text{K}^+$  and  $\text{Cl}^-$  ions at the ends of the bottom and top reservoirs as a function of  $\text{pH}_B$  and  $\text{pH}_T$ .

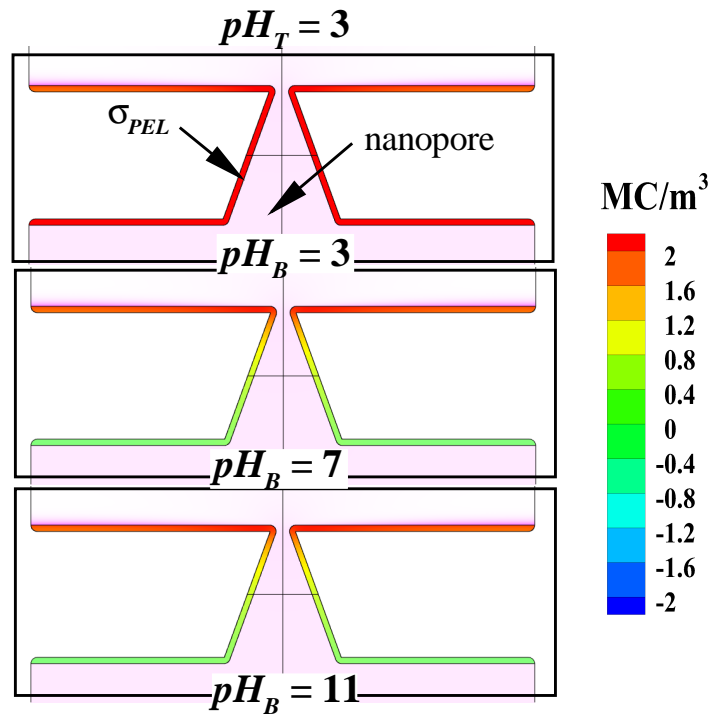

Figure S3: pH-dependent space charge density  $\sigma_{PEL}$  is shown at  $\text{pH}_T = 3$  and  $\text{pH}_B = 3, 7, 10$ ,  $c_B = 10^3$  mM,  $c_T = 10$  mM.

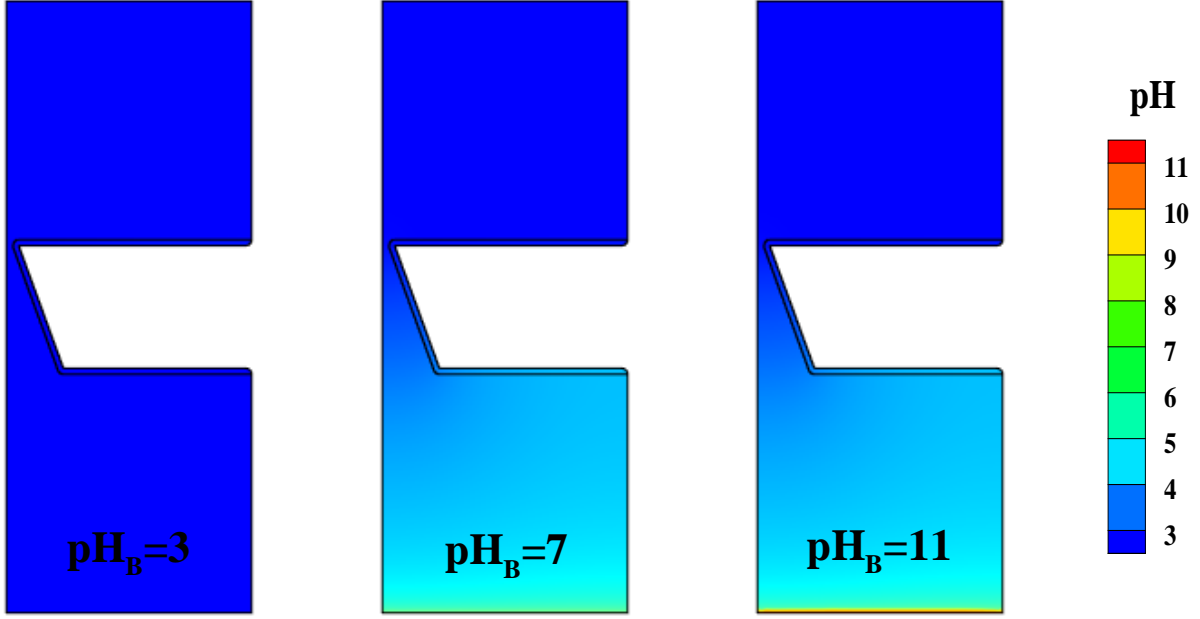

Figure S4: pH of the KCl electrolyte solution at  $pH_T = 3$ ,  $pH_B = 3, 7, 10$ ,  $c_B = 10^3$  mM, and  $c_T = 10$  mM.

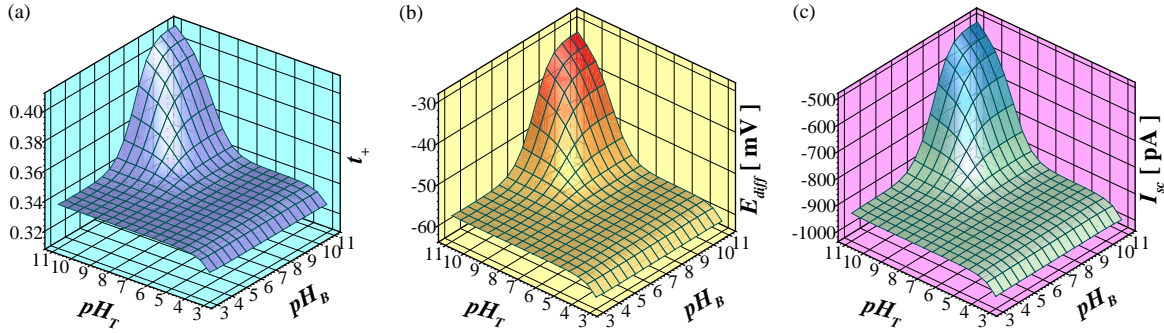

Figure S5: (a) Transference number  $t_+$ , (b) open circuit voltage  $E_{diff}$ , (c) short circuit current  $I_{sc}$  as a functions of  $pH_B$  and  $pH_T$  at  $c_T = 1$  mM and  $c_B = 10^3$  mM for LiCl solution.

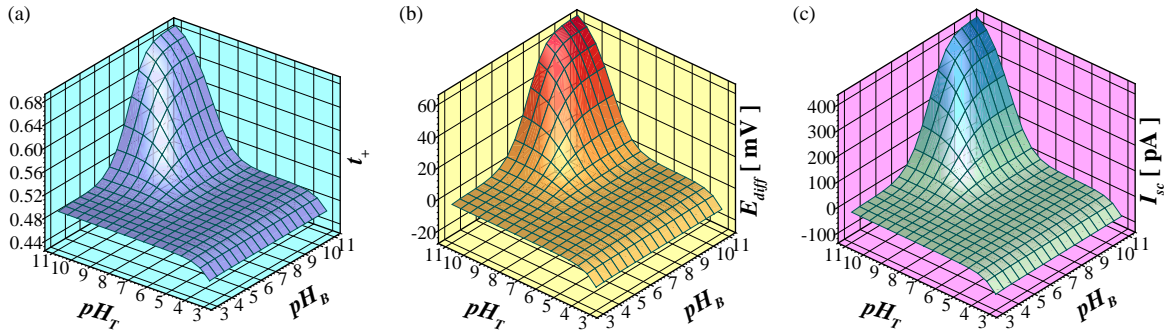

Figure S6: (a) Transference number  $t_+$ , (b) open circuit voltage  $E_{diff}$ , (c) short circuit current  $I_{sc}$  as a functions of  $pH_B$  and  $pH_T$  at  $c_T = 1$  mM and  $c_B = 10^3$  mM for KCl solution for cylindrical nanopore.

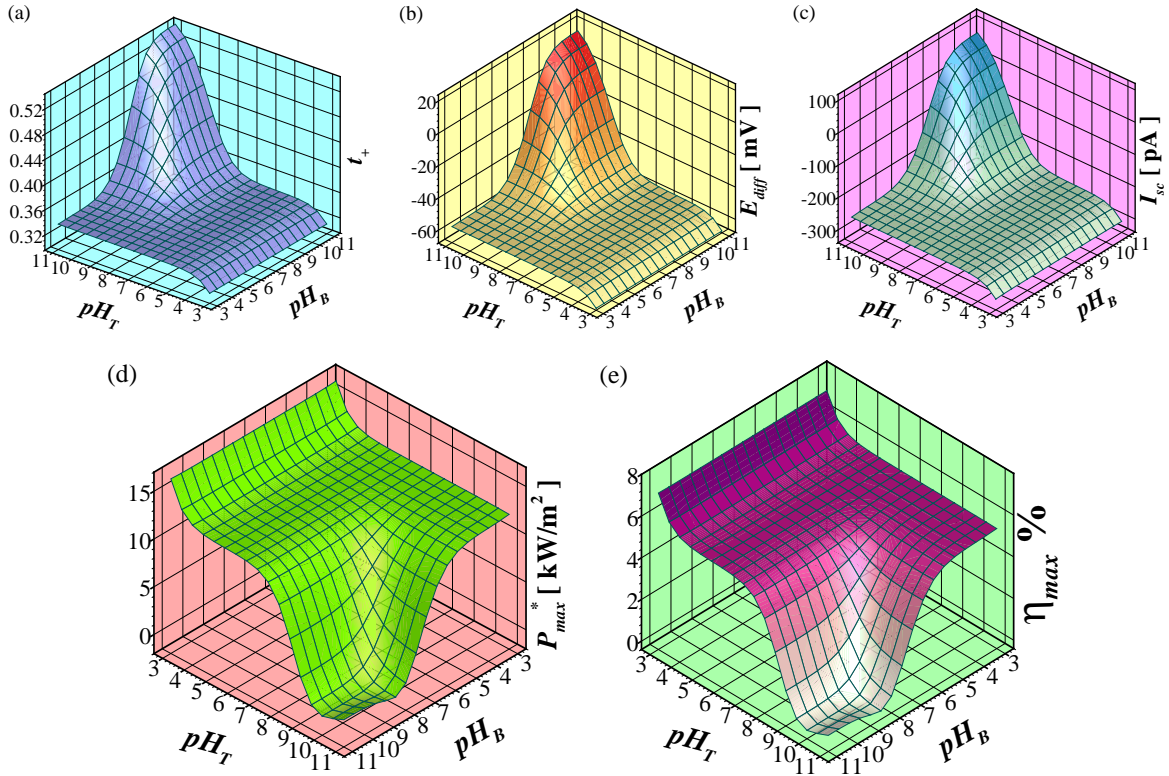

Figure S7: (a) Transference number  $t_+$ , (b) open circuit voltage  $E_{diff}$ , (c) short circuit current  $I_{sc}$ , (d) maximum power density  $P_{max}^*$ , and (e) maximum efficiency  $\eta_{max}$  as a functions of  $pH_B$  and  $pH_T$  at  $c_T = 1$  mM and  $c_B = 10^3$  mM for LiCl solution for cylindrical nanopore.

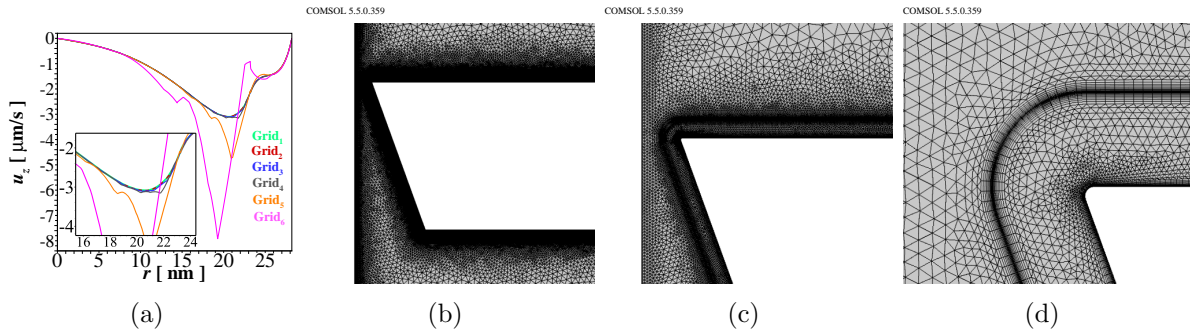

Figure S8: (a) Axial velocity profiles at the middle of the computational domain for a different sets of grid distributions. Here the different grids (1 to 6) corresponds to 81625 (53565+28060), 68963(=50303+18660), 31560(=21960+9600), 21074(=14454+6620), 14300(=9840+4460), and 10717(=7657+3060) elements (triangular+quads). (b-d) Optimal grid distribution ( Grid<sub>2</sub> ) in the vicinity of the conical nanopore is presented; (c) and (d) zoomed in near the tip region.
